# Supplementary material for: Conformational analysis, NMR properties and nitrogen inversion of N-substituted 1,3-oxazines
Source: Royal Society of Chemistry journal article supplement (doi:10.1039/b808929a), 2008-01-01
Supplement: b808929a.pdf [file b808929a.pdf]

## **Conformational analysis, NMR properties and nitrogen inversion of N-substituted 1,3-oxazines.**

Marcela Hurtado, J.Guillermo Contreras\*, Adelio Matamala, Otilia Mó, and Manuel Yáñez\*

*Contribution from, Facultad de Ciencias Químicas, Universidad de Concepción, casilla 160-C, Concepción. Chile and Departamento de Química, C-9. Universidad Autónoma de Madrid. Cantoblanco. 28049- Madrid. Spain.*

**Supporting Information (A total of 4 pages)**

Table S1. B3LYP/6-31G\*\* optimized geometries for N-substituted oxazines. Bond lengths are in Å and angles in degrees.

| Parameters | Methyl |            | Ethyl |            | Propyl |            | i-Propyl |            | t-Butyl |            |
|------------|--------|------------|-------|------------|--------|------------|----------|------------|---------|------------|
|            | Axial  | Equatorial | Axial | Equatorial | Axial  | Equatorial | Axial    | Equatorial | Axial   | Equatorial |
| O1-C2      | 1.433  | 1.410      | 1.433 | 1.411      | 1.434  | 1.411      | 1.438    | 1.416      | 1.436   | 1.417      |
| C2-N3      | 1.439  | 1.453      | 1.441 | 1.456      | 1.440  | 1.456      | 1.431    | 1.449      | 1.435   | 1.454      |
| N3-C4      | 1.460  | 1.456      | 1.460 | 1.458      | 1.459  | 1.458      | 1.454    | 1.455      | 1.498   | 1.493      |
| C4-C5      | 1.550  | 1.533      | 1.550 | 1.533      | 1.549  | 1.533      | 1.548    | 1.536      | 1.554   | 1.536      |
| C5-C6      | 1.538  | 1.533      | 1.536 | 1.533      | 1.536  | 1.532      | 1.539    | 1.534      | 1.536   | 1.532      |
| N3-R       | 1.467  | 1.455      | 1.478 | 1.465      | 1.476  | 1.465      | 1.484    | 1.474      | 1.498   | 1.493      |
| C2-H2a     | 1.102  | 1.115      | 1.102 | 1.115      | 1.102  | 1.115      | 1.103    | 1.112      | 1.104   | 1.112      |
| C2-H2e     | 1.092  | 1.093      | 1.090 | 1.091      | 1.090  | 1.091      | 1.090    | 1.093      | 1.088   | 1.088      |
| C4-H4a     | 1.098  | 1.110      | 1.099 | 1.110      | 1.099  | 1.109      | 1.101    | 1.108      | 1.101   | 1.108      |
| C4-H4e     | 1.091  | 1.092      | 1.091 | 1.092      | 1.091  | 1.092      | 1.090    | 1.090      | 1.087   | 1.087      |
| C6-H6a     | 1.104  | 1.103      | 1.104 | 1.103      | 1.104  | 1.103      | 1.104    | 1.104      | 1.104   | 1.104      |
| C6-H6e     | 1.090  | 1.090      | 1.090 | 1.090      | 1.090  | 1.090      | 1.090    | 1.090      | 1.090   | 1.090      |
| <O1C2N3    | 113.4  | 111.0      | 113.4 | 111.1      | 113.4  | 111.1      | 113.5    | 110.7      | 113.9   | 110.8      |
| <C5C4N3    | 114.8  | 110.3      | 114.9 | 110.5      | 114.8  | 110.4      | 114.7    | 110.4      | 115.6   | 109.8      |
| <H2aC2H2e  | 109.5  | 108.7      | 109.2 | 108.7      | 109.2  | 108.7      | 109.1    | 108.8      | 108.8   | 108.8      |
| <H4aC4H4e  | 107.8  | 108.0      | 107.7 | 107.9      | 107.7  | 108.0      | 107.6    | 108.0      | 107.1   | 108.0      |
| <H6aC6H6e  | 108.7  | 109.0      | 108.7 | 109.6      | 108.7  | 109.0      | 108.7    | 109.0      | 108.6   | 109.0      |
| <C4C5C6    | 109.5  | 109.5      | 109.4 | 109.5      | 109.3  | 109.5      | 109.4    | 109.6      | 109.6   | 109.8      |
| <H2aC2N3   | 108.7  | 111.6      | 108.7 | 111.3      | 108.7  | 111.2      | 109.1    | 112.7      | 108.9   | 112.1      |
| <H4aC4N3   | 108.0  | 112.2      | 108.0 | 112.4      | 108.1  | 112.5      | 108.5    | 113.1      | 107.9   | 113.1      |
| <C2O1C6C5  | -56.6  | -56.1      | -56.8 | -55.8      | -56.6  | -55.6      | -56.4    | -55.7      | -57.0   | -55.2      |
| <C2N3C4C5  | 49.0   | 56.3       | 49.2  | 56.7       | 49.5   | 57.0       | 48.3     | 57.8       | 47.2    | 58.4       |
| <O1C2N3C7  | 72.9   | 171.0      | 73.9  | 170.8      | 74.5   | 170.5      | 86.6     | 160.5      | 90.3    | 159.6      |

Table S2. Total energies ( $E$ , hartrees), zero point energy corrections (ZPE, hartrees), enthalpy thermal corrections ( $H_{\text{corr}}$ , hartrees), Gibb's free energy thermal corrections ( $G_{\text{corr}}$ , hartrees); entropy ( $S$ , cal mol<sup>-1</sup> K<sup>-1</sup>), dipole moments ( $\mu$ ), relative enthalpies ( $\Delta H^\circ$ , kcal mol<sup>-1</sup>) and relative Gibb's free energies ( $\Delta G^\circ$ , kcal mol<sup>-1</sup>)

| Energy <sup>a</sup>               | Methyl      |             | Ethyl       |              | Propyl      |             | i-Propyl    |             | t-Butyl     |             |
|-----------------------------------|-------------|-------------|-------------|--------------|-------------|-------------|-------------|-------------|-------------|-------------|
|                                   | Axial       | Equatorial  | Axial       | Equatorial   | Axial       | Equatorial  | Equatorial  | Axial       | Equatorial  | Axial       |
| <b>HF/6-31G(d,p) geometry</b>     |             |             |             |              |             |             |             |             |             |             |
| $E_0^{(2)}$ [MP2/6-31G(d,p)]      | -569.292365 | -569.290142 | -608.481374 | -608.473577  | -647.658985 | -647.655581 | -647.659508 | -647.658793 | -686.843460 | -686.842988 |
| $E_0^{(3)}$ [MP2/6-311G(d,p)]     | -569.525091 | -569.523274 | -608.725012 | -608.719911  | -647.917960 | -647.914975 | -647.918619 | -647.917992 | -687.116108 | -687.115811 |
| $E_0^{(4)}$ [MP2/6-311+G(d,p)]    | -569.550367 | -569.549218 | -608.751020 | -608.746301  | -647.943959 | -647.941837 | -647.944753 | -647.944921 | -687.143164 | -687.143571 |
| $E_0^{(5)}$ [MP2/6-311++G(d,p)]   | -569.551437 | -569.550254 | -608.752278 | -608.747509  | -647.945353 | -647.943154 | -647.946213 | -647.946284 | -687.144765 | -687.145074 |
| ZPE                               | 0.209094    | 0.208582    | 0.237144    | 0.238833     | 0.269539    | 0.269092    | 0.268836    | 0.268572    | 0.298837    | 0.298501    |
| $H_{\text{corr}}$                 | 0.219900    | 0.219500    | 0.247930    | 0.251118     | 0.283012    | 0.282728    | 0.282263    | 0.282119    | 0.313263    | 0.313155    |
| $G_{\text{corr}}$                 | 0.173775    | 0.173090    | 0.202277    | 0.201030     | 0.230081    | 0.229034    | 0.230308    | 0.229506    | 0.259667    | 0.258010    |
| $S^b$                             | 97.077      | 97.677      | 96.084      | 105.419      | 111.403     | 113.009     | 109.349     | 110.734     | 112.801     | 116.064     |
| $\mu$ (D)                         | 4.160       | 5.578       | 4.129       | 5.483        | 4.130       | 5.411       | 4.149       | 5.368       | 4.119       | 5.272       |
| $E_0^{(4)} + \text{ZPE}$          | -569.341277 | -569.340636 | -608.513876 | -608.507468  | -647.674420 | -647.672745 | -647.675917 | -647.676349 | -686.844327 | -686.845070 |
| $E_0^{(4)} + H_{\text{corr}}$     | -569.330467 | -569.329718 | -608.503090 | -608.495183  | -647.660947 | -647.659109 | -647.662490 | -647.662802 | -686.829901 | -686.830416 |
| $E_0^{(4)} + G_{\text{corr}}$     | -569.376592 | -569.376128 | -608.548743 | -608.545271  | -647.713878 | -647.712803 | -647.714445 | -647.715415 | -686.883497 | -686.885561 |
| $\Delta H^{\circ(4)c}$            | -0.470      |             | -4.962      |              | -1.100      |             | 0.196       |             | 0.324       |             |
| $\Delta G^{\circ(4)c}$            | -0.291      |             | -2.179      |              | -0.675      |             | 0.609       |             | 1.296       |             |
| <b>B3LYP/6-31G(d,p) geometry</b>  |             |             |             |              |             |             |             |             |             |             |
| $E_0^{(6)}$ [B3LYP/6-31G(d,p)]    | -570.938542 | -570.937188 | -610.256524 | -610.254212  | -649.573022 | -649.570567 | -649.571062 | -649.570629 | -688.884268 | -688.883853 |
| $E_0^{(7)}$ [B3LYP/6-311G(d,p)]   | -571.078165 | -571.077212 | -610.404188 | -610.402319  | -649.728232 | -649.726405 | -649.726520 | -649.726317 | -689.047357 | -689.047142 |
| $E_0^{(8)}$ [B3LYP/6-311+G(d,p)]  | -571.091344 | -571.091240 | -610.417108 | -610.416124  | -649.741383 | -649.740243 | -649.73872  | -649.739722 | -689.059258 | -689.060595 |
| $E_0^{(9)}$ [B3LYP/6-311++G(d,p)] | -571.091621 | -571.091485 | -610.417389 | -610.416403  | -649.741686 | -649.740534 | -649.739055 | -649.740021 | -689.059608 | -689.060921 |
| ZPE                               | 0.193964    | 0.193379    | 0.222258    | 0.221826     | 0.250853    | 0.250202    | 0.250116    | 0.249721    | 0.278248    | 0.277814    |
| $H_{\text{corr}}$                 | 0.205482    | 0.204998    | 0.235186    | 0.234867     | 0.265148    | 0.264673    | 0.264435    | 0.264172    | 0.293685    | 0.293471    |
| $G_{\text{corr}}$                 | 0.157929    | 0.157135    | 0.184102    | 0.183239     | 0.210566    | 0.209319    | 0.210523    | 0.209664    | 0.238047    | 0.23656     |
| $S^b$                             | 100.085     | 101.12      | 107.515     | 108.661      | 114.876     | 116.503     | 113.469     | 114.72      | 117.102     | 119.778     |
| $\mu$ (D)                         | 3.528       | 4.736       | 3.496       | 4.654        | 3.478       | 4.598       | 3.498       | 4.616       | 3.472       | 4.527       |
| $E_0^{(8)} + \text{ZPE}$          | -570.897380 | -570.897861 | -610.194850 | -610.1942984 | -649.490530 | -649.490041 | -649.488605 | -649.490001 | -688.781010 | -688.782781 |
| $E_0^{(8)} + H_{\text{corr}}$     | -570.885862 | -570.886242 | -610.181922 | -610.1812574 | -649.476235 | -649.475570 | -649.474286 | -649.475550 | -688.765573 | -688.767124 |
| $E_0^{(8)} + G_{\text{corr}}$     | -570.933415 | -570.934105 | -610.233006 | -610.2328854 | -649.530817 | -649.530924 | -649.528198 | -649.530058 | -688.821211 | -688.824035 |
| $\Delta H^{\circ(8)c}$            | 0.238454    |             | -0.417168   |              | -0.416854   |             | 0.792858    |             | 0.973518    |             |
| $\Delta G^{\circ(8)c}$            | 0.432982    |             | -0.075803   |              | 0.067583    |             | 1.166854    |             | 1.772338    |             |

Table S3. Relative free energies (kcal mol<sup>-1</sup>) of the axial isomer of the methyl and ethyl derivatives obtained at two different levels of theory. The values within parenthesis correspond to the percentage of the axial isomer.

| <b>Solvent</b>                  | <b>Theoretical model</b> | <b>Methyl</b>   | <b>Ethyl</b>    |
|---------------------------------|--------------------------|-----------------|-----------------|
| Gas                             | MP2/6-311+G**            | -0.29<br>(62.0) | -0.44<br>(67.8) |
|                                 | MP2/6-311+G(3df,2p)      | -0.42<br>(67.2) | -0.58<br>(72.6) |
| CH <sub>2</sub> Cl <sub>2</sub> | MP2/6-311+G**            | 0.68<br>(24.1)  | 0.68<br>(24.1)  |
|                                 | MP2/6-311+G(3df,2p)      | 0.40<br>(33.9)  | 0.35<br>(35.5)  |
